# Supplementary material for: RhoA activation during polarization and cytokinesis of the early Caenorhabditis elegans embryo is differentially dependent on NOP-1 and CYK-4
Source: PubMed Central journal article supplement — Mol Biol Cell. 2012 Oct 15;23(20):4020–31. doi: 10.1091/mbc.E12-04-0268 (PMC3469517; doi:10.1091/mbc.e12-04-0268), 2012-10-15
Supplement: supp_E12-04-0268_CombinedSupMats.pdf [file supp_E12-04-0268_CombinedSupMats.pdf]

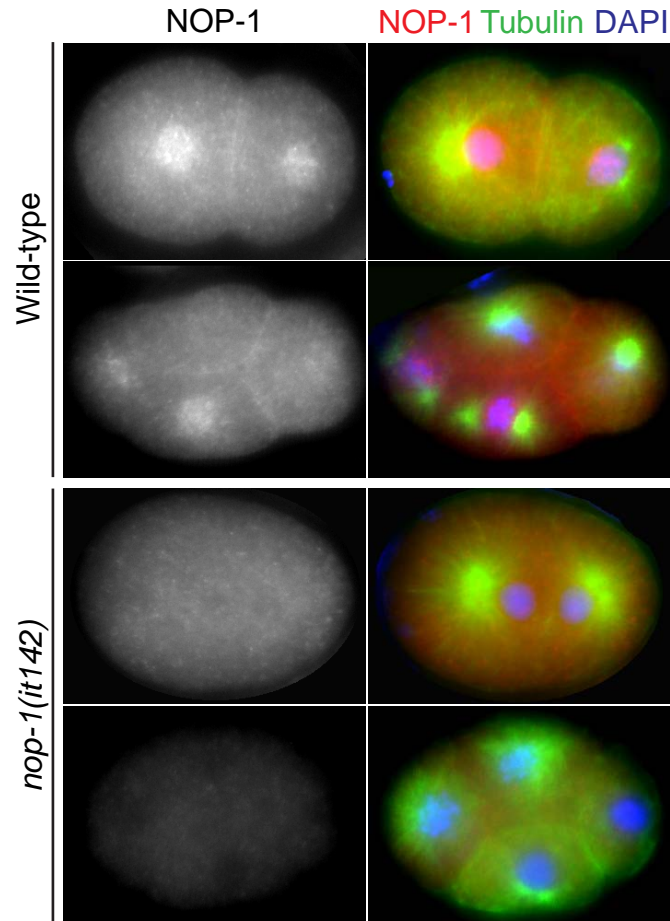

**Figure S2.** Immunolocalization of NOP-1. Control and *nop-1(it142)* embryos were fixed and immunolabeled with antibodies directed against tubulin and a C-terminal NOP-1 peptide. This epitope is located C-terminal to the premature stop codon in *nop-1(it142)*.

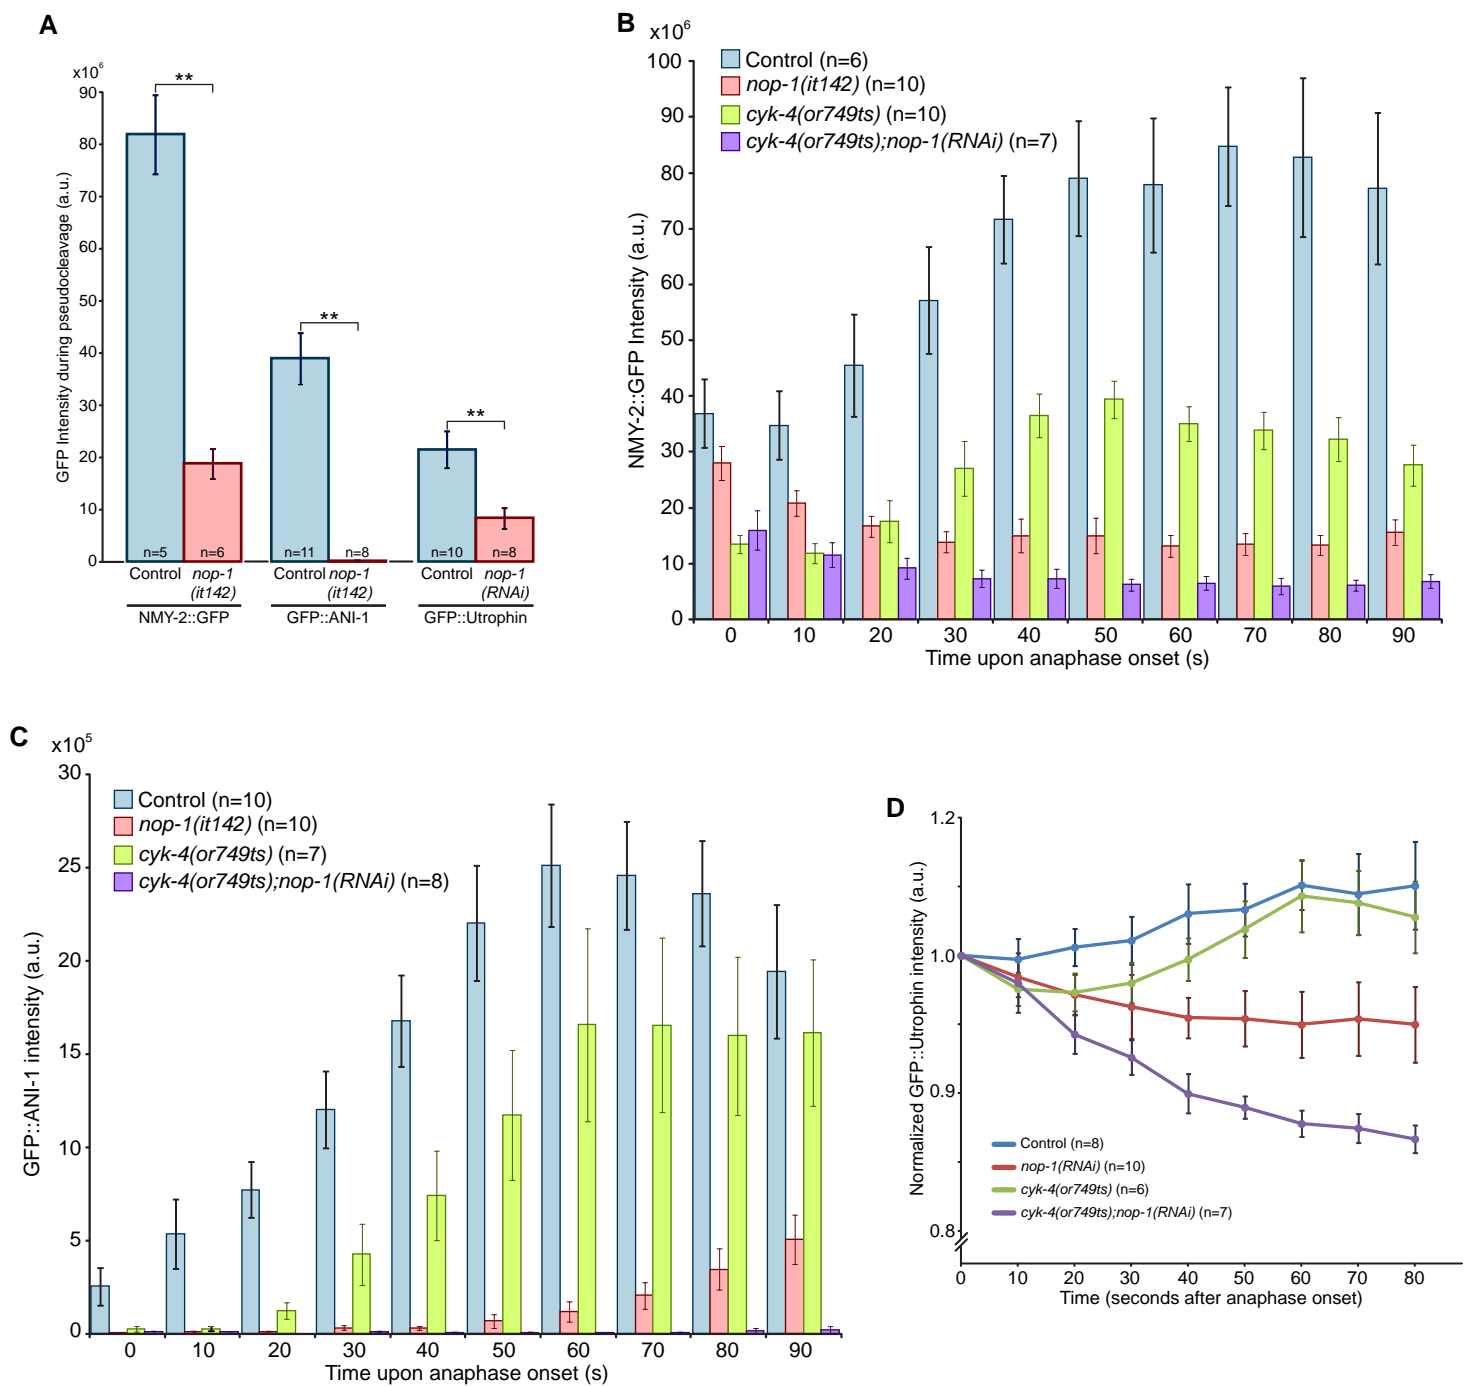

**Figure S3.** NOP-1 and CYK-4 promote accumulation of RhoA effectors during pseudocleavage and cytokinesis. Images were acquired as described in figures 3 and 4. The accumulation of cortical NMY-2::GFP during pseudocleavage (A) and cytokinesis (B), the accumulation of cortical GFP::ANI-1 during cytokinesis (C), and the accumulation of cortical GFP::Utrophin were quantified as described in the methods section. Error bars represent S.E.M. \*\* indicates  $p < 0.01$ .

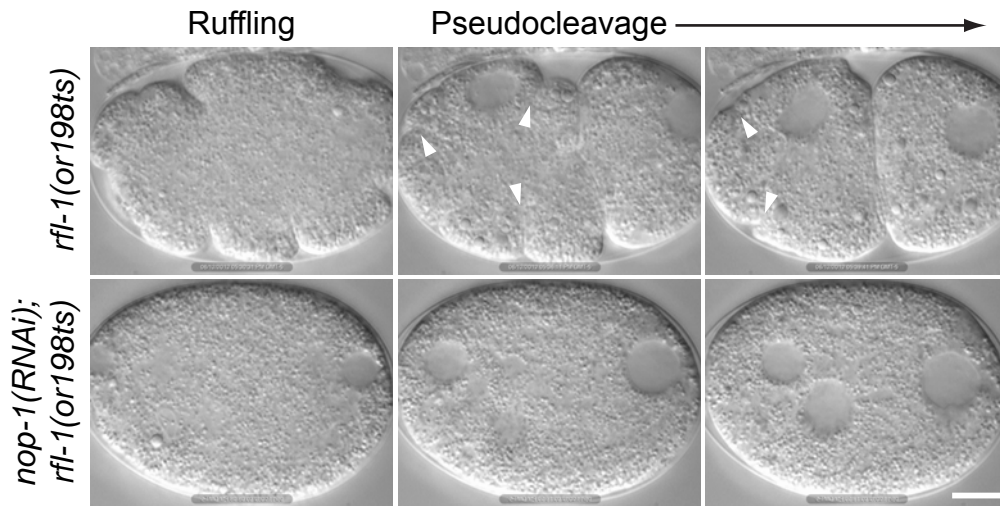

**Figure S4.** Images from a time-lapse sequences *rfl-1(or198ts)* and, *rfl-1(or198ts);nop-1(RNAi)* embryos during polarization. *rfl-1* embryos are hypercontractile forming ectopic pseudocleavage furrows (white arrows), whereas the contractility is absent in *rfl-1(or198ts);nop-1(RNAi)* embryos. Scale bar represents 10  $\mu$ m.

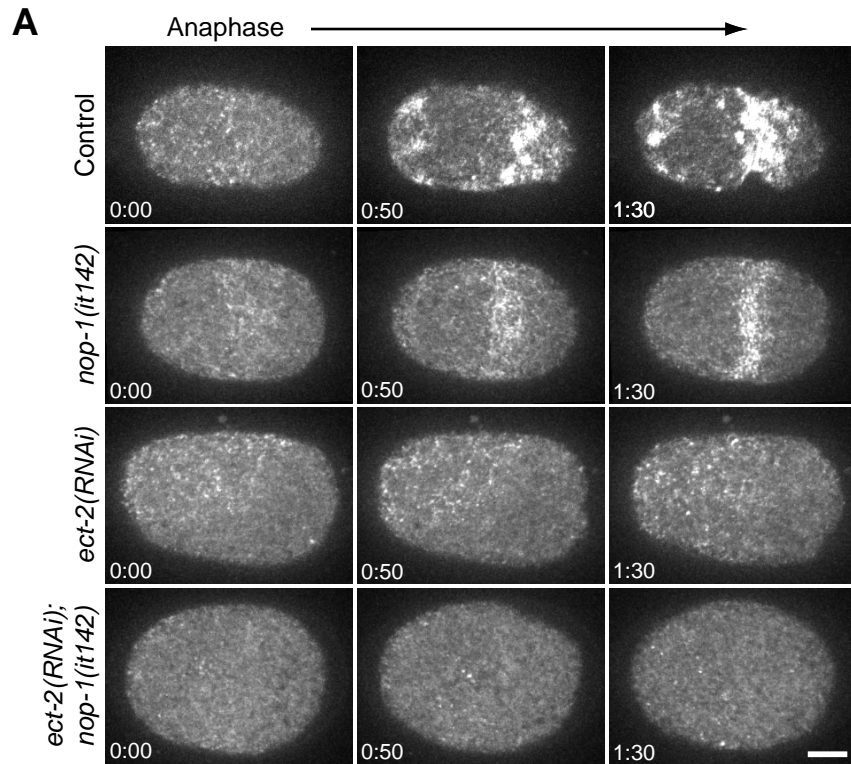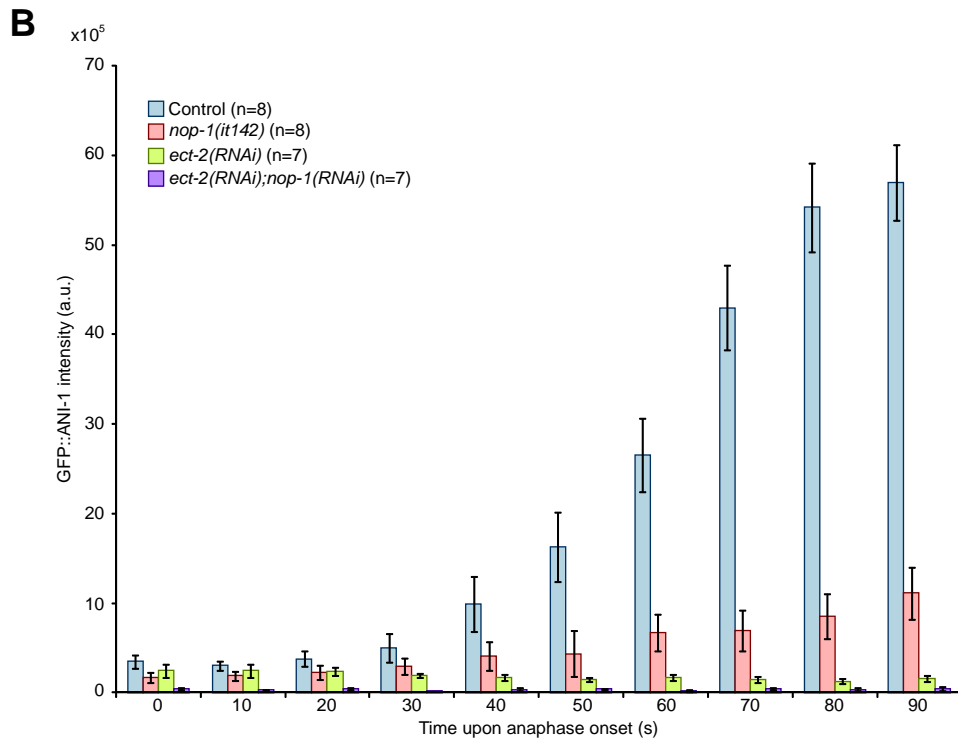

**Figure S5.** Anillin recruitment is ECT-2 dependent. (A) Cortical confocal images of GFP::Anillin in control, *nop-1(it142)*, *ect-2(RNAi)*, *nop-1(it142);ect-2(RNAi)* embryos at the indicated times after anaphase onset. (B) Quantitation of the accumulation of cortical GFP::ANI-1 from embryos like those in (A). Depletion of ECT-2 all but eliminates recruitment of GFP::ANI-1. Error bars represent  $\pm$  SEM.

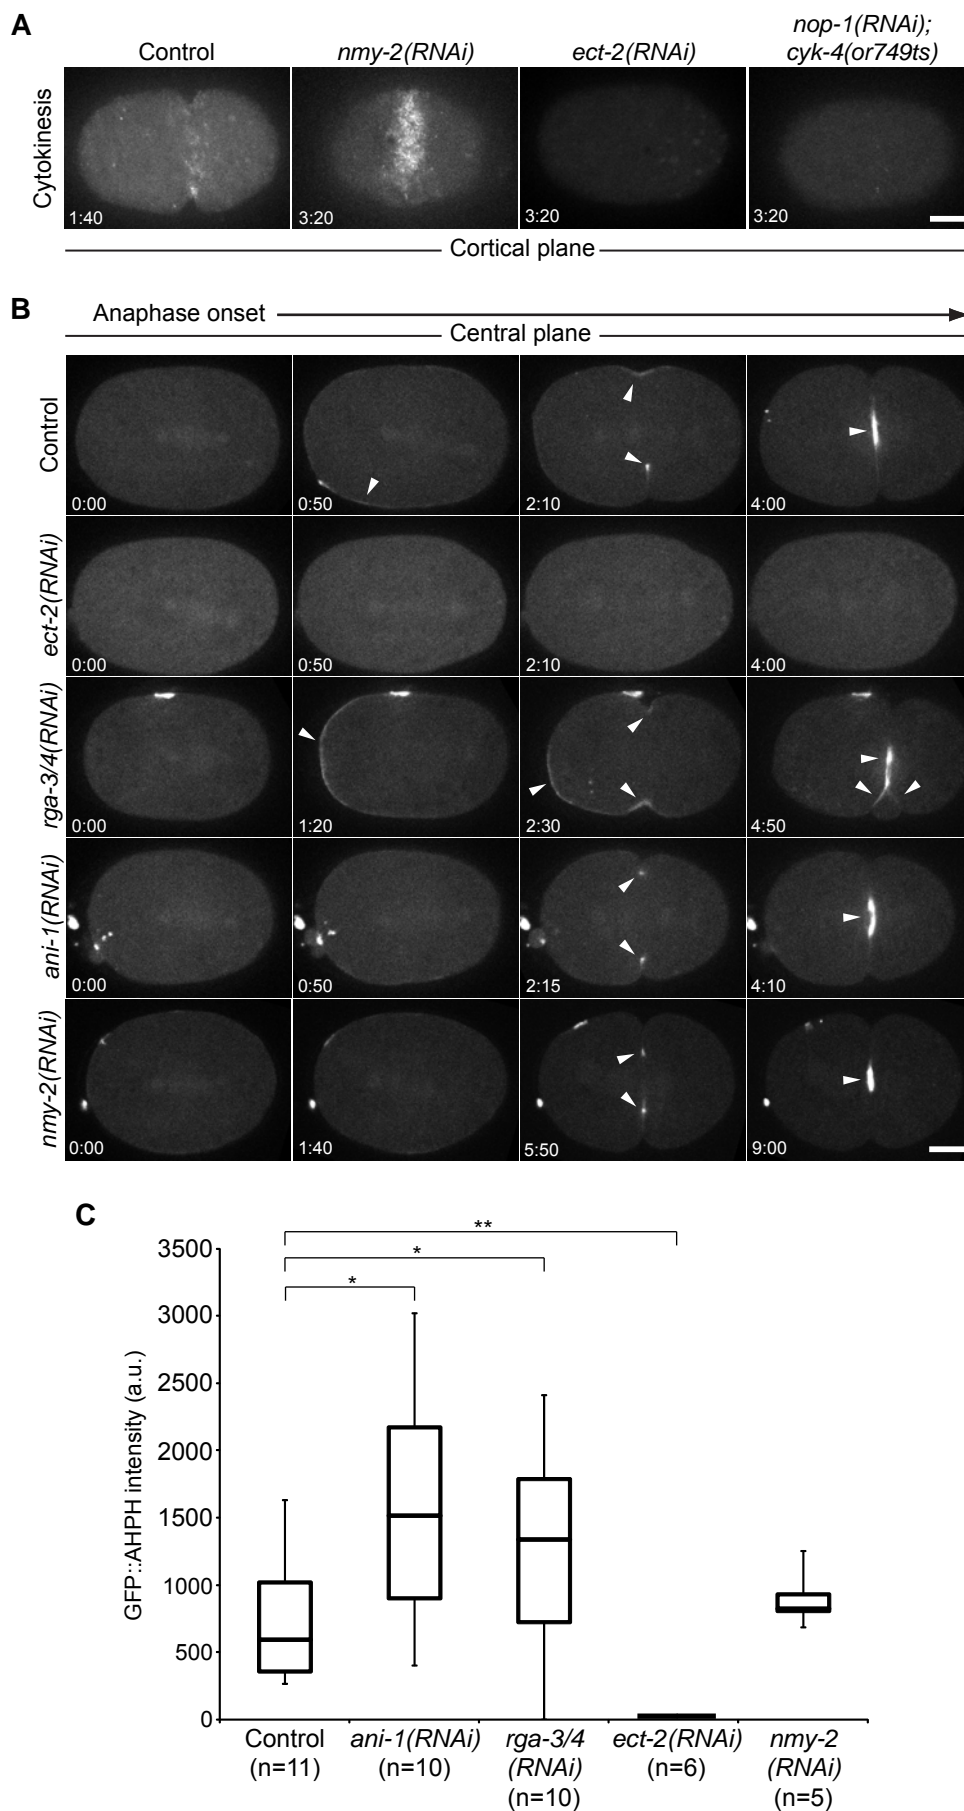

**Figure S6.** Validation of RhoA reporter. (A) Cortical confocal images of GFP::AHPH in embryos depleted of NMY-2, ECT-2 or *cyk-4(or749ts)* embryos depleted of NOP-1. (B) Accumulation of GFP::AHPH at the midplane of embryos depleted of ECT-2, RGA-3/4, ANI-1, or NMY-2 by RNAi. For the quantitative analysis, we restricted the analysis of NMY-2-depleted embryos to those which furrow to completion, but exhibit pronounced delays in furrowing (~100s). Indicated times represent min:sec following anaphase onset. Scale bar 10  $\mu$ m. (C) Box-whisker plot of the equatorial accumulation of GFP::AHPH of embryos as shown in (A). \*\* indicates  $p < 0.01$ .

**Table S1. Worm strains used in this study.**

| <b>Strain #</b> | <b>Genotype</b>                                                                                                                                                                 |
|-----------------|---------------------------------------------------------------------------------------------------------------------------------------------------------------------------------|
| N2              | <i>Ancestral N2 Bristol strain; “wild-type”</i>                                                                                                                                 |
| KK725           | <i>nop-1(it142)III</i>                                                                                                                                                          |
| MG586           | <i>mgSi2[cb-UNC-119(+)] GFP::<i>NOP-1</i>] II; <i>unc-119(ed3) III</i></i>                                                                                                      |
| MG593           | <i>nop-1(it142)III; mgSi2[cb-UNC-119(+)] GFP::<i>NOP-1</i>] II</i>                                                                                                              |
| MG532           | <i>zuIs45 [nmy-2::<i>NMY-2</i>::<i>GFP</i> + <i>unc-119(+)] V; tjIs57 [pie-1::<i>mCherry</i>::<i>HIS-58</i>; <i>unc-119(+)]</i></i></i>                                         |
| MG576           | <i>nop-1(it142) III; zuIs45 [nmy-2::<i>NMY-2</i>::<i>GFP</i> + <i>unc-119(+)] V; tjIs57 [pie-1::<i>mCherry</i>::<i>HIS-58</i>; <i>unc-119(+)]</i></i></i>                       |
| MG542           | <i>ltIs28 [pASM14; pie-1::<i>GFP-TEV-STag</i>::<i>ani-1</i>; <i>unc-119 (+)]</i>; <i>tjIs57 [pie-1::<i>mCherry</i>::<i>HIS-58</i>; <i>unc-119(+)]</i></i></i>                   |
| MG567           | <i>nop-1(it142); ltIs28 [pASM14; pie-1::<i>GFP-TEV-STag</i>::<i>ani-1</i>; <i>unc-119 (+)]</i>; <i>tjIs57 [pie-1::<i>mCherry</i>::<i>HIS-58</i>; <i>unc-119(+)]</i></i></i>     |
| MG589           | <i>mgSi3[cb-UNC-119 (+)] GFP::<i>UTROPHIN</i>]II</i>                                                                                                                            |
| JH2754          | <i>ect-2(ax751) II</i>                                                                                                                                                          |
| OD239           | <i>cyk-4(or749)III; ltIs38 [pAA1; pie-1/<i>GFP</i>::<i>PH(PLC1delta1) unc-119 (+)]III</i>; <i>ltIs37[pAA64; pie-1::<i>mCHERRY</i>::<i>HIS-58</i>; <i>unc-119 (+)]IV</i></i></i> |
| MG512           | <i>cyk-4(or749) nop-1(it142)III</i>                                                                                                                                             |
| MG520           | <i>cyk-4(or749)III; zuIs45[nmy-2::<i>NMY-2</i>::<i>GFP</i> + <i>unc-119(+)]IV</i>; <i>ltIs37[pAA64; pie-1::<i>mCHERRY</i>::<i>HIS-58</i>; <i>unc-119 (+)]</i></i></i>           |
| MG612           | <i>cyk-4(or749)III; ltIs28 [pASM14; pie-1::<i>GFP-TEV-STag</i>::<i>ani-1</i>; <i>unc-119 (+)]</i>; <i>tjIs57 [pie-1::<i>mCherry</i>::<i>his-58</i>; <i>unc-119(+)]</i></i></i>  |
| MG628           | <i>cyk-4(or749)III; mgSi3[cb-UNC-119 (+)] GFP::<i>UTROPHIN</i>]II; <i>ltIs37[pAA64; pie-1::<i>mCHERRY</i>::<i>HIS-58</i>; <i>unc-119 (+)]IV</i></i></i>                         |
| DH244           | <i>zyg-9(b244)II</i>                                                                                                                                                            |
| MG636           | <i>mgSi5[cb-UNC-119 (+)] GFP::<i>ANI-1(AH+PH)]II</i>; <i>nop-1(it142) III</i></i>                                                                                               |
| MG637           | <i>cyk-4(or749)/unc-64(e246)III; mgSi5[cb-UNC-119 (+)] GFP::<i>ANI-1(AH+PH)]II</i>; <i>tjIs57 [pie-1::<i>mCherry</i>::<i>HIS-58</i>; <i>unc-119(+)]</i></i></i>                 |
| MG617           | <i>mgSi5[cb-UNC-119 (+)] GFP::<i>ANI-1(AH+PH)]II</i></i>                                                                                                                        |
| OD58            | <i>unc-119(ed3) III; ltIs38 [pAA1; pie-1::<i>GFP</i>::<i>PH(PLC1delta1)</i>; <i>unc-119 (+)]</i></i>                                                                            |
| MG481           | <i>nop-1(it142)III; ltIs38 [pAA1; pie-1::<i>GFP</i>::<i>PH(PLC1delta1)</i>; <i>unc-119 (+)]</i></i>                                                                             |
| JH2647          | <i>axIs1928 [mCherry::<i>par-6</i>]. oxIs1182 [<i>GFP</i>::<i>par-2</i>]</i>                                                                                                    |
| JH2657          | <i>ect-2(ax751) II; axIs1928 [mCherry::<i>par-6</i>]. oxIs1182 [<i>GFP</i>::<i>par-2</i>]</i>                                                                                   |
| MG596           | <i>nop-1(it142)III; axIs1928 [mCherry::<i>par-6</i>]. oxIs1182 [<i>GFP</i>::<i>par-2</i>]</i>                                                                                   |
| EU626           | <i>rfl-1(or198) III.</i>                                                                                                                                                        |
